# Supplementary material for: Operando study of palladium nanoparticles inside UiO-67 MOF for catalytic hydrogenation of hydrocarbons
Source: Royal Society of Chemistry journal article supplement (doi:10.1039/c7fd00224f), 2018-01-01
Supplement: c7fd00224f2.pdf [file c7fd00224f2.pdf]

## Electronic Supplementary Information

### Operando study of palladium nanoparticles inside UiO-67 MOF for catalytic hydrogenation of hydrocarbons

A. L. Bugaev,<sup>\*a,b</sup> Alexander A. Guda,<sup>a</sup> Kirill A. Lomachenko,<sup>c</sup> Elizaveta G. Kamyshova,<sup>a</sup> Mikhail A. Soldatov,<sup>a</sup> Gurpreet Kaur,<sup>d</sup> Sigurd Øien-Ødegaard,<sup>d</sup> Luca Braglia,<sup>a,b,e</sup> Andrea Lazzarini,<sup>d</sup> Maela Manzoli,<sup>e</sup> Silvia Bordiga,<sup>b,d</sup> Unni Olsbye,<sup>d</sup> Karl P. Lillerud,<sup>d</sup> Alexander V. Soldatov,<sup>a</sup> Carlo Lamberti<sup>\*a,g</sup>

<sup>a</sup> *The Smart Materials Research Center, Southern Federal University, Sladkova 178/24, 344090, Rostov-on-Don, Russia  
Email: abugaev@sfedu.ru*

<sup>b</sup> *Department of Chemistry and NIS Interdepartmental Centre, University of Turin, via P. Giuria 7, 10125 Turin, Italy*

<sup>c</sup> *European Synchrotron Radiation Facility, 71 avenue des Martyrs, CS 40220, 38043 Grenoble Cedex 9, France † Footnotes relating to the title and/or authors should appear here.*

<sup>d</sup> *Centre for Materials Science and Nanotechnology, Department of Chemistry, University of Oslo, Sem Saelands vei 26, 0315 Oslo, Norway*

<sup>e</sup> *CNR-IOM, TASC Laboratory, in Area Science Park, S.S.14, Km 163.5, I-34149, Trieste, Italy*

<sup>f</sup> *Department of Drug Science and Technology, University of Turin, via Pietro Giuria, 10125 Turin, Italy*

<sup>g</sup> *Department of Physics and CrisDi Interdepartmental Centre, University of Turin, via P. Giuria 1, 10125 Turin, Italy  
Email: carlo.lamberti@unito.it*

\*Corresponding authors: [abugaev@sfedu.ru](mailto:abugaev@sfedu.ru) ; [carlo.lamberti@unito.it](mailto:carlo.lamberti@unito.it)

## S1. Analysis of electron diffraction pattern of UiO-67

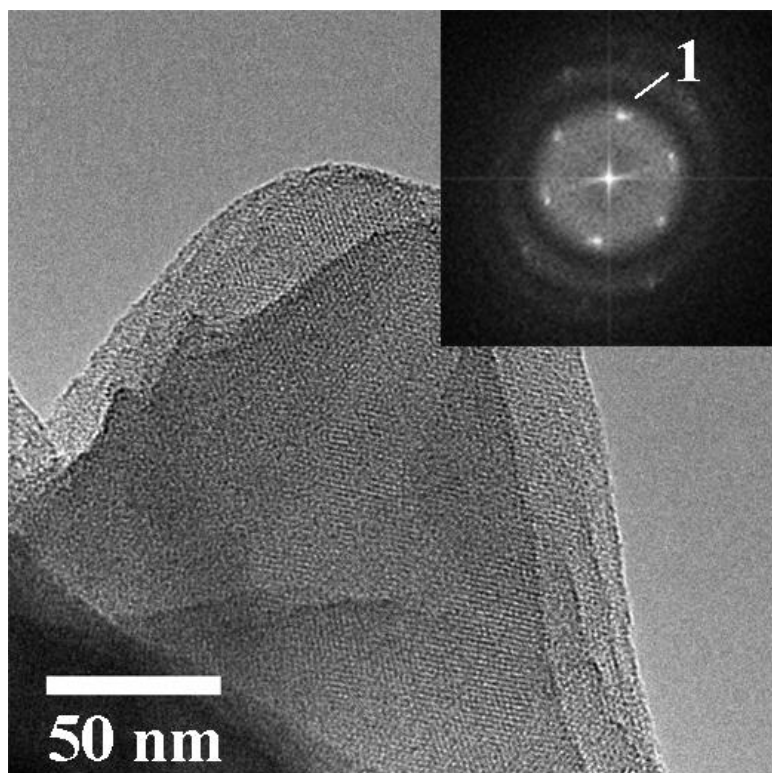

**Figure S1.** TEM image with its FT shown in the inset of UiO-67 material.

**Table S1.** Summary of electron diffraction analysis performed on the data reported in Figure S1.

| Spot # | d-spacing (nm) | Rec. pos. (1/nm) | Degrees to Spot 1 | Degrees to x-axis | Amplitude  |
|--------|----------------|------------------|-------------------|-------------------|------------|
| 1      | 1.546          | 0.6469           | 0.00              | 78.46             | 1325211.63 |
| 2      | 1.479          | 0.6760           | 58.13             | 20.33             | 596891.13  |
| 3      | 1.504          | 0.6650           | 115.64            | -37.18            | 545962.44  |
| 4      | 1.538          | 0.6503           | 179.55            | -101.09           | 1325211.63 |
| 5      | 1.483          | 0.6741           | 122.22            | -159.32           | 596891.13  |
| 6      | 1.514          | 0.6605           | 64.37             | 142.83            | 545962.44  |

## S2. Analysis of electron diffraction pattern of activated UiO-67-Pd samples

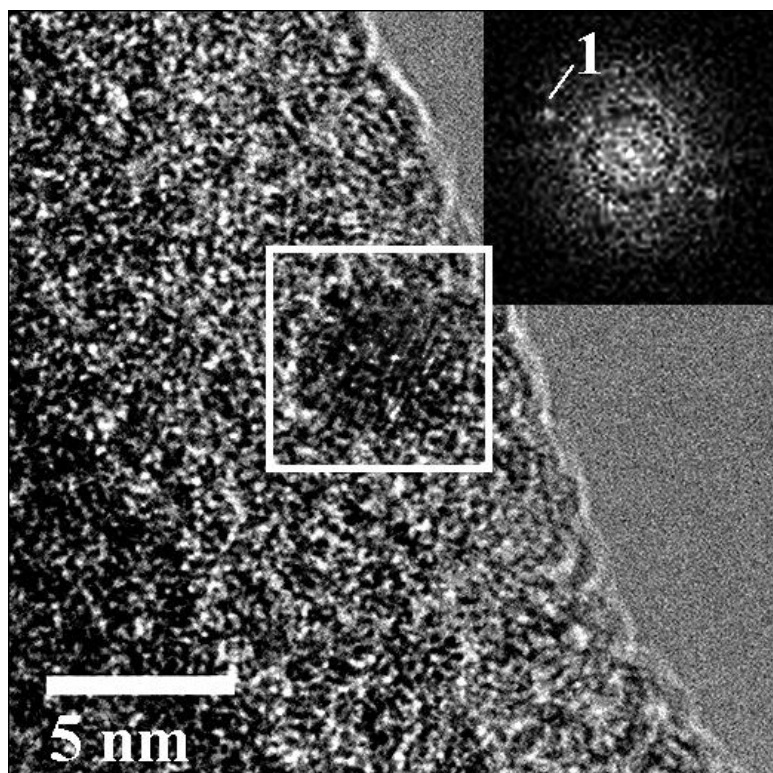

**Figure S1.** TEM image of activated UiO-67-Pd material with FT of the area highlighted by white square.

**Table S2.** Summary of electron diffraction analysis performed on the data reported in Figure S2.

| Spot # | d-spacing (nm) | Rec. pos. (1/nm) | Degrees to Spot 1 | Degrees to x-axis | Amplitude |
|--------|----------------|------------------|-------------------|-------------------|-----------|
| 1      | 0.2185         | 4.577            | 0.00              | -25.10            | 113277.54 |
| 2      | 0.2212         | 4.521            | 179.63            | 155.27            | 113277.54 |
